# Supplementary material
Source: PubMed Central journal article supplement (PMC3677296)
Supplement: mt201350x1.pdf [file mt201350x1.pdf]

**SUPPLEMENTARY MATERIAL**

**Figure S1 Electron micrographs of normal canine retinas 1 week following intravitreal injection of PBS or CNTF.** Compared to the PBS control retina (a), the CNTF treated retina shows severe shortening and disorganization of the rod and cone photoreceptor outer segments (b1, b2). Cone inner segments are labeled (C). Calibration bars = 2.5  $\mu$ m.

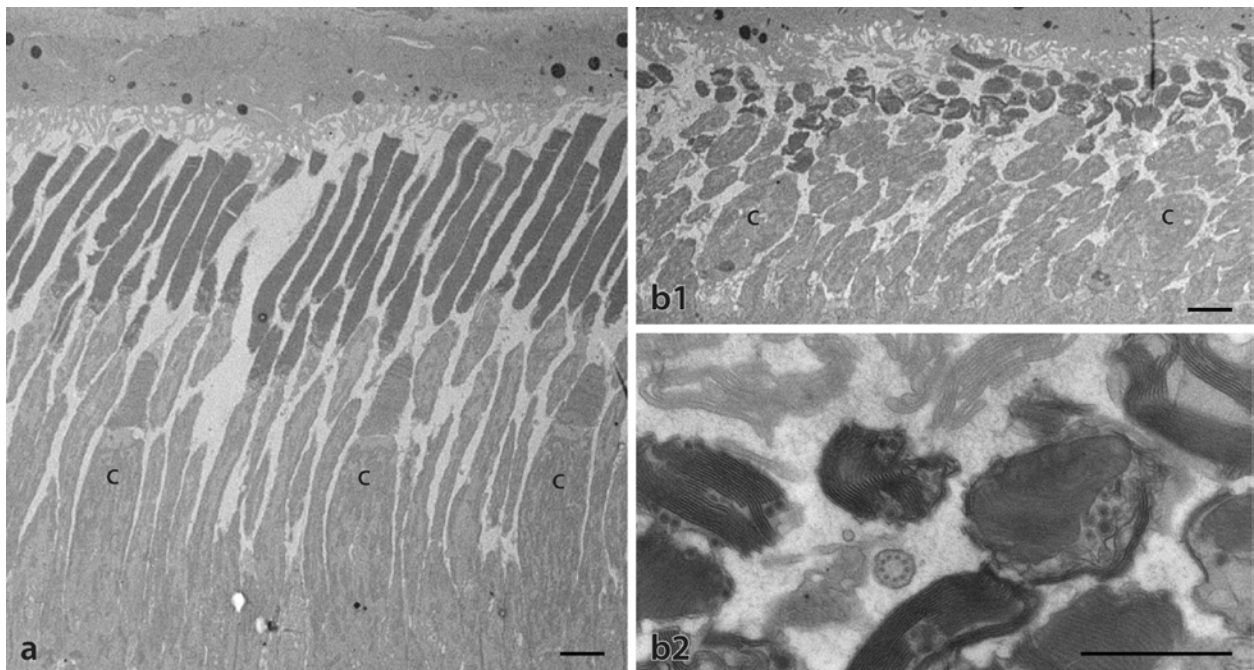

Figure S1

**Figure S2 Partial restoration of CNGA3 and GNAT2 protein localization in the *CNGB3*-mutant retina 1 week following intravitreal CNTF injection.** Normal (wt) cone photoreceptors show both CNGA3 (A2) and GNAT2 (A5) present in the outer segments and co-localize with L/M-opsin (A1, A3 and A4, A6). The cone outer segments of untreated, adult mutants [ACHM (untreated)] contain no detectable CNGA3 (B2) and GNAT2 (B5). L/M-opsin localization remains unaffected by the mutation (B1, B3, and B4, B6). One week following intravitreal CNTF in the mutant eye [ACHM (1 week post CNTF)] cone outer segments are fewer in numbers and severely shortened (C1, C4), but some of them weakly express CNGA3 (arrows in C2 and C3) and GNAT2 (arrows in C5 and C6). Cell nuclei are shown in blue with DAPI. ACHM, achromatopsia-affected; wt, wildtype. Calibration bar = 10  $\mu$ m.

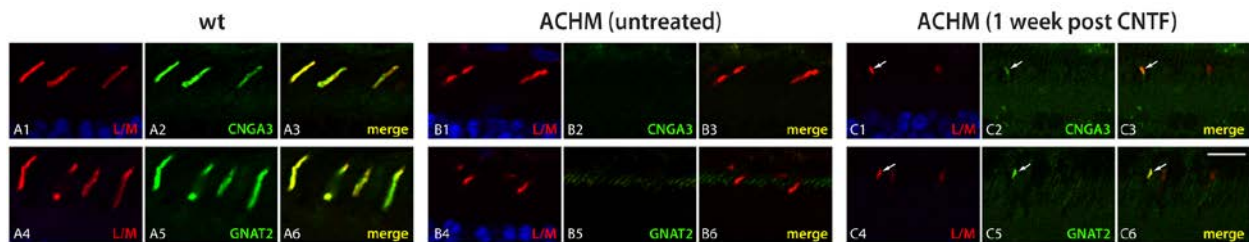

Figure S2

**Table S1.** Intravitreal CNTF injections in normal dogs.

| Dog ID / gender | Age (months) | Eye | Treatment | Studies (weeks post treatment) |     |    |         |         |
|-----------------|--------------|-----|-----------|--------------------------------|-----|----|---------|---------|
|                 |              |     |           | ERG                            | IHC | EM | qRT-PCR | Western |
| M636 / m        | 7.3          | R   | CNTF      | 0, 1                           | 1   |    |         |         |
|                 |              | L   | PBS       | 0, 1                           | 1   |    |         |         |
| M637 / m        | 7.3          | R   | CNTF      | 0, 1                           |     |    |         |         |
|                 |              | L   | PBS       | 0, 1                           |     |    |         |         |
| M638 / m        | 7.3          | R   | CNTF      | 0, 1                           |     |    | 1       |         |
|                 |              | L   | PBS       | 0, 1                           |     |    | 1       |         |
| M670 / m        | 4.5          | R   | CNTF      | 0, 0.5, 1                      |     |    |         | 1       |
|                 |              | L   | PBS       | 0, 0.5, 1                      |     |    |         | 1       |
| M667 / m        | 5.8          | R   | CNTF      | 0, 1                           |     |    |         |         |
|                 |              | L   | PBS       | 0, 1                           |     |    |         |         |
| M645 / m        | 19.8         | R   | CNTF      | 0, 1                           |     | 1  |         |         |
|                 |              | L   | PBS       | 0, 1                           |     | 1  |         |         |
| GS122 / m       | 6.3          | R   | CNTF      | 0, 2                           | 2   |    |         |         |
|                 |              | L   | PBS       | 0, 2                           | 2   |    |         |         |
| GS125 / f       | 6.3          | R   | CNTF      | 0, 2                           |     |    | 2       |         |
|                 |              | L   | PBS       | 0, 2                           |     |    | 2       |         |
| M672 / f        | 4.5          | R   | CNTF      | 0, 0.5, 2                      |     |    |         | 2       |
|                 |              | L   | PBS       | 0, 0.5, 2                      |     |    |         | 2       |
| M640 / f        | 7.3          | R   | CNTF      | 0, 5                           |     |    | 5       |         |
|                 |              | L   | PBS       | 0, 5                           |     |    | 5       |         |
| M641 / f        | 7.3          | R   | CNTF      | 0, 5                           | 5   |    |         |         |
|                 |              | L   | PBS       | 0, 5                           | 5   |    |         |         |
| GS121 / m       | 6.3          | R   | CNTF      | 0, 5                           |     |    |         | 5       |
|                 |              | L   | PBS       | 0, 5                           |     |    |         | 5       |

Gender: m, male; f, female

Eye: R, right; L, left

Treatments: Intravitreal injection of either CNTF (12 µg in 30 µL PBS) or PBS (30 µL).

Studies: ERG, electroretinogram; IHC, immunohistochemistry; EM, electron microscopy; qRT-PCR, quantitative real-time PCR; Western, western blot

**Table S2.** Antibodies and reagents used for immunohistochemistry (IHC) and western blotting (WB).

| Antigen                                                              | Expected retinal localization or target protein | Host              | Working dilution                  | Source, Catalog Number or Name                   |
|----------------------------------------------------------------------|-------------------------------------------------|-------------------|-----------------------------------|--------------------------------------------------|
| Human cone arrestin                                                  | Cone photoreceptors                             | Rabbit polyclonal | 1 : 10,000                        | Cheryl Craft (University of Southern California) |
| L/M-cone opsin                                                       | Outer segments of L/M-cones                     | Rabbit polyclonal | 1 : 100                           | Chemicon, AB5405                                 |
| S-cone opsin                                                         | Outer segments of S-cones                       | Goat polyclonal   | 1 : 100                           | Santa Cruz, sc-22117                             |
|                                                                      |                                                 | Rabbit polyclonal | 1 : 5,000                         | Chemicon, AB5407                                 |
| Cone <i>alpha</i> transducin (GNAT2)                                 | Cone outer segments                             | Goat polyclonal   | 1 : 50                            | Santa Cruz, sc-14363                             |
|                                                                      |                                                 | Rabbit polyclonal | 1 : 5,000                         | Santa Cruz, sc-390                               |
| <i>Alpha</i> subunit of cone cyclic nucleotide-gated channel (CNGA3) | Cone outer segments                             | Rabbit polyclonal | 1 : 5,000                         | Komáromy and colleagues <sup>10</sup>            |
| Rod opsin                                                            | Rod outer segments                              | Mouse monoclonal  | 1 : 100                           | Chemicon, MAB5316                                |
| pSTAT1 (Tyr701)                                                      | Activation of Jak/Stat signaling pathway        | Rabbit monoclonal | 1 : 1,000 (IHC)<br>1 : 2,000 (WB) | Cell Signaling Technology, #9167                 |
| pSTAT3 (Tyr705)                                                      | Activation of Jak/Stat signaling pathway        | Rabbit polyclonal | 1 : 1,000 (IHC)<br>1 : 2,000 (WB) | Cell Signaling Technology, #9131                 |
| Phospho Histone H3 (Ser 10) (PHH3)                                   | Cell mitosis                                    | Rabbit polyclonal | 1 : 50                            | Millipore, 06-570                                |
| TUNEL (In Situ Cell Death Detection Kit, Fluorescein)                | Apoptotic cell nuclei                           |                   | kit instructions                  | Roche, 11684 795 910                             |
| Actin                                                                | Loading control (WB)                            | Mouse Monoclonal  | 1 : 20,000                        | Chemicon, MAB1501                                |

Chemicon, Millipore Corporation, Temecula, CA; Santa Cruz Biotechnology Inc., Santa Cruz, CA; Cell Signaling Technology Inc., Danvers, MA; Roche Applied Science, Indianapolis, IN.

**Table S3:** Designed primers and probes for qRT-PCR and exon junction crossed by PCR product.<sup>10</sup>

| <b>Gene</b>       | <b>Forward Primer</b>        | <b>MGB Probe</b>     | <b>Reverse Primer</b>    | <b>Exon Junction</b> |
|-------------------|------------------------------|----------------------|--------------------------|----------------------|
| <i>hCNGB3</i>     | AAGAAGGCTCTCACCCAAGTAATC     | TCAGCAAACCACAGCAC    | GTGTGGCTCTTCAGACGTGACT   | 1-2                  |
| <i>cNGA3</i>      | GCCCTGCCTGTCTTCTATAACTG      | TGTGCAGGGCCTGTT      | CACAGCATCACGTGCTCAGA     | 5-6                  |
| <i>cNGB3</i>      | AAGATCCTGATCCAAGCAATCAG      | CTCAGCAATCTACAAGACA  | CTTCAAACGTGACTGGAGTCATCT | 1-2                  |
| <i>cL/M opsin</i> | CAGCGTCATCATACTGTGCTACCT     | ATCCGAGCGGTGGC       | GGACTCAGATTCTTTCTGCTGCTT | 4-5                  |
| <i>cS opsin</i>   | CGCCATGTTTGTGCTTTGG          | CTCTACAGCAGGTCTGGTGA | GATGACAATGTAGCGCTCAAAGG  | 1-2                  |
| <i>cNGA1</i>      | ATGAAACCCCCATGCAA            | ATCCATCACAGAGGGA     | TGGCACCAGGCAGGTA CTG     | 2-3                  |
| <i>cNGB1</i>      | TGCATTATCCTGAGTCTCAGAAGTTAC  | AGAAGGCCAGGCGCA      | TCCTTGGGCTTGTTGTTATTTCTC | 16-17                |
| <i>cRho</i>       | ATGATTGT CATATTCTTCTGCTATGGA | CAGTCAAGGAGGCAGCT    | TGGGTGGTGGCCGATTC        | 3-4                  |
